# Supplementary material for: Tuning the porosity and surface characteristics of nanoporous titania using non-ionic surfactant reverse micelles
Source: Royal Society of Chemistry journal article supplement (doi:10.1039/c8ra05495a), 2018-01-01
Supplement: c8ra05495a1.pdf [file c8ra05495a1.pdf]

## Supplementary Information

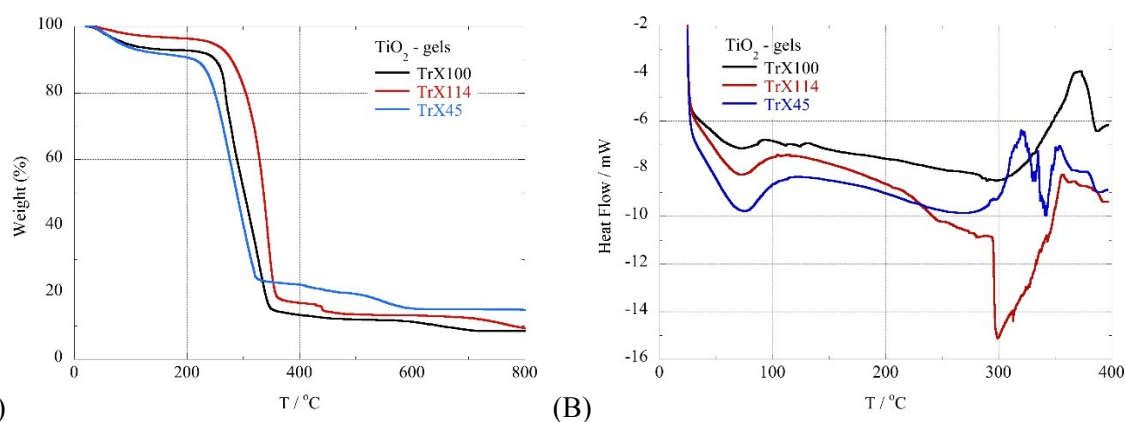

**Figure 1S.** TGA (A) and DSC (B) profiles of the three different TiO<sub>2</sub>-Triton-X gels.

**Table 1S.** TGA (A) and DSC (B) data of the three different TiO<sub>2</sub> - Triton-X gels.

| TGA sample TiO <sub>2</sub> | temperature range (°C) | weight loss (%)* | DSC sample TiO <sub>2</sub> | temperature range (°C) | temperature peak max (°C) | enthalpy (J/g) |
|-----------------------------|------------------------|------------------|-----------------------------|------------------------|---------------------------|----------------|
| gel Triton X-100            | 34.1 - 177.4           | 6.05             | gel Triton X-100            | 28.9 - 93.9            | 63.4                      | endo: 32.4     |
|                             | 208.1 - 400            | 69.35            |                             | 276.4 - 314            | 289.7                     | endo: 5.2      |
|                             | 562.9 - 721.5          | 3.03             |                             | 315.2 - 387.4          | 367.6                     | exo: 94.7      |
| gel Triton X-114            | 34.1 - 167.2           | 2.32             | gel Triton X-114            | 28.3 - 96.9            | 66.4                      | endo: 57.2     |
|                             | 209.8 - 392.3          | 57.93            |                             | 293.7 - 342            | 299.4                     | endo: 106.5    |
|                             | 397.4 - 481            | 2.32             |                             | 343.2 - 392.7          | 356                       | exo: 57.2      |
| gel Triton X-45             | 682.3 - 800            | 2.32             | gel Triton X-45             | 30.7 - 102.3           | 70.5                      | endo: 64.1     |
|                             | 30.7 - 160.3           | 6.8              |                             | 243 - 293.7            | 276.8                     | endo: 9.7      |
|                             | 194.5 - 339.4          | 56.59            |                             | 296.7 - 336.7          | 320.2                     | exo: 42.8      |
|                             | 385.5 - 475.9          | 2.19             |                             | 343.8 - 388.6          | 350.8                     | exo: 41.2      |
|                             | 486.1 - 593.6          | 3.89             |                             |                        |                           |                |

\*The values of weight losses are normalized.

**Table 2S.** Characteristic surface data of the titania solids obtained after calcination at 500 °C & 600 °C for 2 hours of the corresponding TiO<sub>2</sub>-Triton X gels.

| δείγμα                             | SpA <sub>BET</sub> (m <sup>2</sup> /g) | V <sub>Sp</sub> (cm <sup>3</sup> /g) | d <sub>BJH</sub> (nm) | d <sub>DFT</sub> (nm) | % microporosity |
|------------------------------------|----------------------------------------|--------------------------------------|-----------------------|-----------------------|-----------------|
| TiO <sub>2</sub> TrX-100 500 °C 2h | 67.5                                   | 0.097                                | 3.97                  | 6.36                  | 7.3             |
| TiO <sub>2</sub> TrX-114 500 °C 2h | 46.1                                   | 0.064                                | 3.63                  | 6.24                  | 11.8            |
| TiO <sub>2</sub> TrX-45 500 °C 2h  | 47.2                                   | 0.062                                | 3.55                  | 5.93                  | 9.3             |

| δείγμα                             | SpA <sub>BET</sub> (m <sup>2</sup> /g) | V <sub>Sp</sub> (cm <sup>3</sup> /g) | d <sub>BJH</sub> (nm) | d <sub>DFT</sub> (nm) | % microporosity |
|------------------------------------|----------------------------------------|--------------------------------------|-----------------------|-----------------------|-----------------|
| TiO <sub>2</sub> TrX-100 600 °C 2h | 31                                     | 0.06                                 | 4.85                  | 9.29                  | 3.3             |
| TiO <sub>2</sub> TrX-114 600 °C 2h | 4.6                                    | 0.006                                | 3.31                  | 8.6                   | 14.7            |
| TiO <sub>2</sub> TrX-45 600 °C 2h  | 0.7                                    | 0.000                                | 2.64                  | -                     | -               |

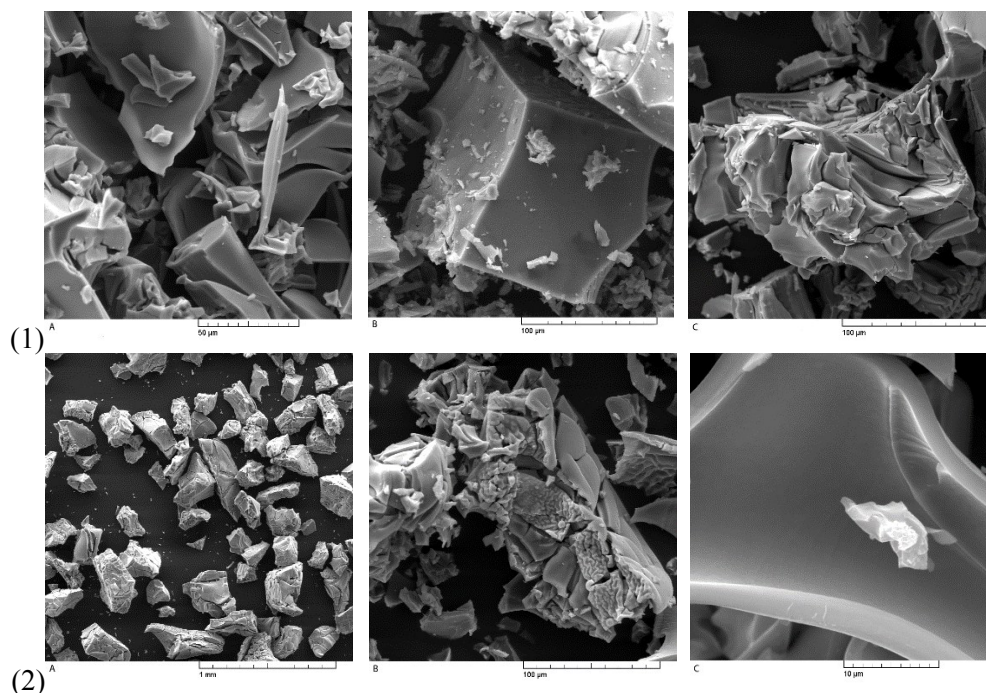

**Figure 2S.** SEM micrographs of  $\text{TiO}_2$  solids from the three different reverse micelles: (1A) Triton X-100, (1B) Triton X-114, (1C) Triton X-45 calcined at 400 °C for 2 h in different magnifications. SEM images of titania samples from the reverse microemulsions (2A) Triton X-114 calcined at 600 °C for 2 h and (2B & C) Triton X-100 calcined at 800 °C for 2 h in two magnifications.
